# Supplementary material for: Diversity of Neofusicoccum parvum for the Production of the Phytotoxic Metabolites (-)-Terremutin and (R)-Mellein
Source: MDPI journal article supplement (doi:10.3390/jof8030319), 2022-03-19
Supplement: s1 [file s1]

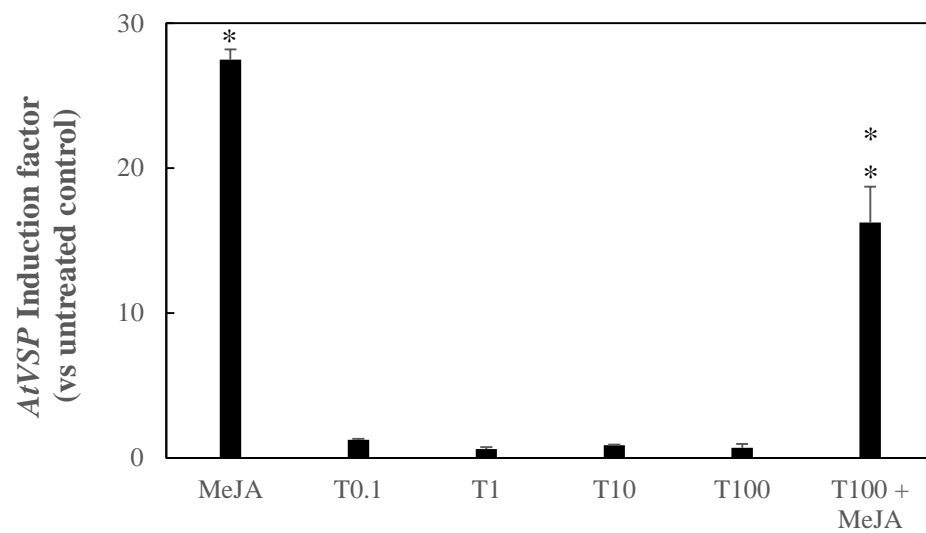

**Figure S1**

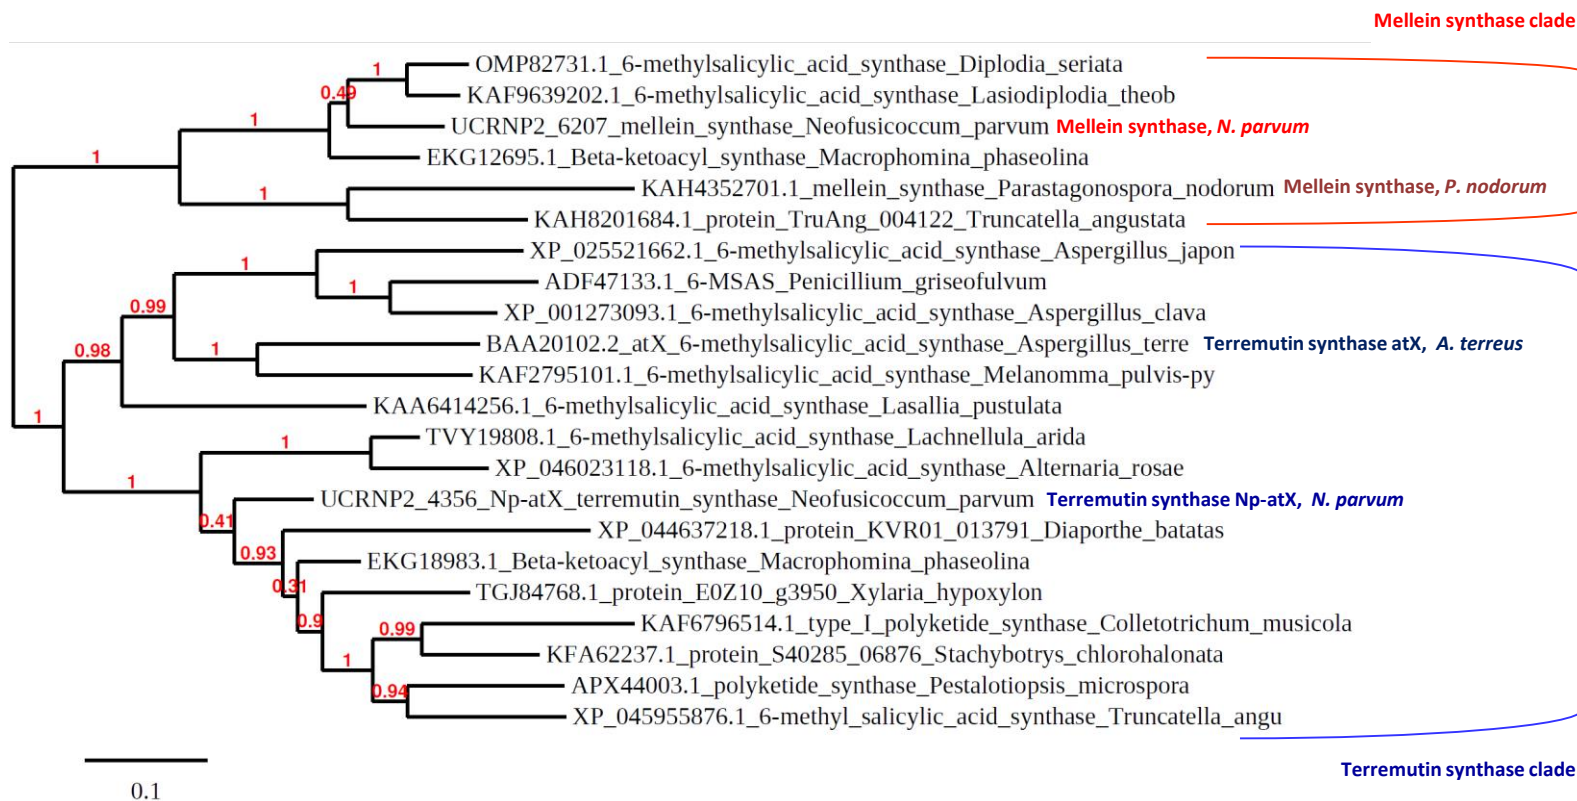

Figure S2

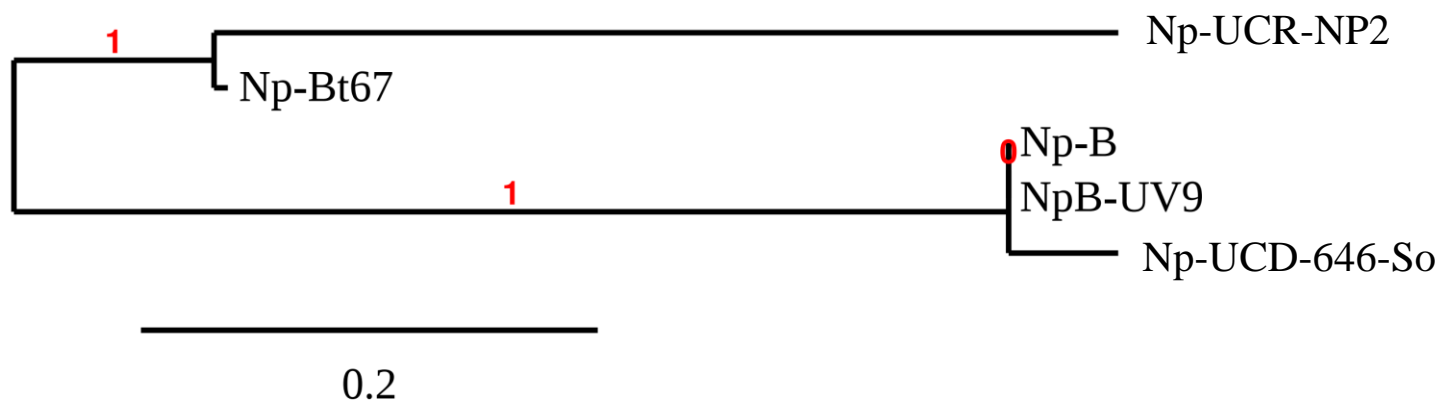

**Figure S3**

**A**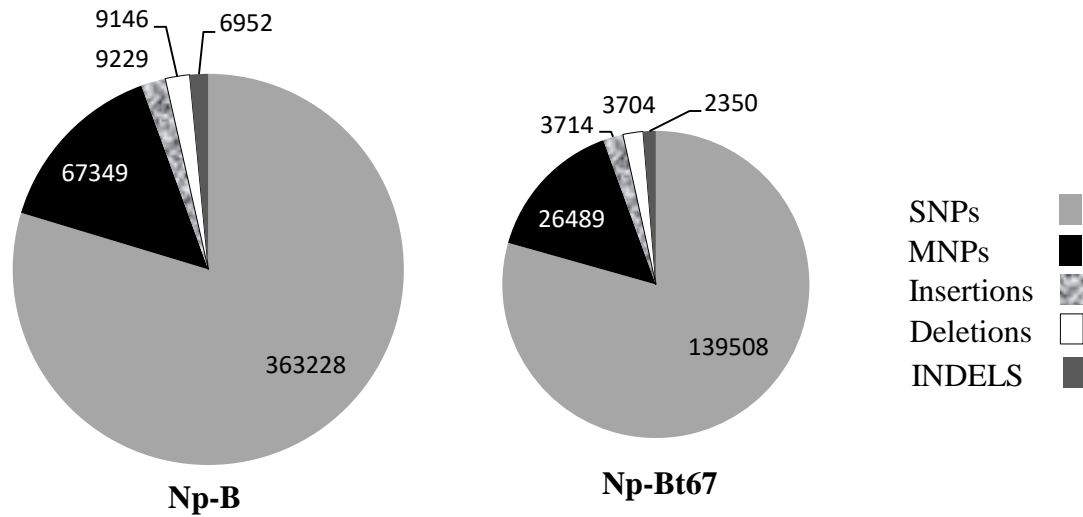**B**

| Genomic differences between Np-B and Np-Bt67    |        |
|-------------------------------------------------|--------|
| SNPs differences after filtering (*)            | 305339 |
| INDELs and MNPs differences after filtering (*) | 76823  |

(\*) major allele read count frequency  $\geq 0.8$

**Figure S4**

**Table S1. Biosynthetic Gene clusters (BGCs) involved in secondary metabolism (SM) identified in the genome of *N. parvum* isolate Np-UCR-NP2-v3.** The genome sequence of the reference isolate Np-UCR-NP2-v3 was analyzed with AntiSMASH fungal version, with defaults parameters [65]. *N. parvum* BGCs with similarity to known BGCs of 100% are highlighted in green, while those with a similarity between 30 and 90% are highlighted in yellow. 60 BGCs were detected. Ten BGCs carried a single gene encoding a NRPS, ten a NRPS-like, 18 a PKS, and 11 a terpene synthase, while other BGCs carried combinations of NRPS, PKS, hybrid PKS-NRPS, and terpene synthase. 11 BCGs have significant similarities (>30%, protein level) with SM gene clusters from other fungi (dimethylcoprogen, DHN melanin, patulin, alternapyrone, pyranonigrin, ilicicolin, mellein and terreutinin/terreic acid).

| Contig     | Region        | Type            | From    | To      | Most similar known cluster                       | Key gene type               | Similarity |
|------------|---------------|-----------------|---------|---------|--------------------------------------------------|-----------------------------|------------|
| KB916495.1 | Region 722.1  | betalactone     | 49,501  | 72,006  |                                                  |                             |            |
| KB916648.1 | Region 847.1  | betalactone     | 44,357  | 75,083  |                                                  |                             |            |
| KB915688.1 | Region 42.1   | NRPS            | 1       | 27,915  |                                                  |                             |            |
| KB915768.1 | Region 112.1  | NRPS            | 47,393  | 105,202 |                                                  |                             |            |
| KB915926.1 | Region 255.1  | NRPS            | 1       | 53,154  | dimethylcoprogen                                 | NRP                         | 100%       |
| KB915996.1 | Region 307.1  | NRPS            | 1       | 46,294  |                                                  |                             |            |
| KB916027.1 | Region 335.1  | NRPS            | 5,013   | 43,666  |                                                  |                             |            |
| KB916118.1 | Region 416.1  | NRPS            | 1       | 40,624  |                                                  |                             |            |
| KB916185.1 | Region 472.1  | NRPS            | 34,514  | 91,064  |                                                  |                             |            |
| KB916208.1 | Region 487.1  | NRPS            | 11,386  | 83,786  | leucinostatin A / leucinostatin B                | Polyketide                  | 10%        |
| KB916760.1 | Region 944.1  | NRPS            | 10,429  | 36,515  | hexadehydroastechrome / tereazine-D / astechrome | NRP                         | 37%        |
| KB916846.1 | Region 1012.1 | NRPS            | 31,26   | 81,782  |                                                  |                             |            |
| KB916008.1 | Region 317.1  | NRPS,T1PKS      | 1       | 44,985  |                                                  |                             |            |
| KB916424.1 | Region 662.1  | NRPS,T1PKS      | 1       | 34,504  | equisetin                                        | NRP + Polyketide            | 27%        |
| KB916836.1 | Region 1006.1 | NRPS,T1PKS      | 1,452   | 46,922  | pyranonigrin E                                   | Polyketide                  | 100%       |
| KB916836.1 | Region 1006.2 | NRPS,T1PKS      | 61,37   | 111,856 | ilicicolin H                                     | NRP + Polyketide            | 50%        |
| KB916847.1 | Region 1013.1 | NRPS,T1PKS      | 4,136   | 55,628  | oxaleimide C                                     | NRP + Polyketide            | 10%        |
| KB915669.1 | Region 25.1   | NRPS-like       | 1       | 14,044  |                                                  |                             |            |
| KB915971.1 | Region 288.1  | NRPS-like       | 70,345  | 109,121 |                                                  |                             |            |
| KB915983.1 | Region 297.1  | NRPS-like       | 27,278  | 60,046  |                                                  |                             |            |
| KB916221.1 | Region 499.1  | NRPS-like       | 1       | 13,308  |                                                  |                             |            |
| KB916267.1 | Region 534.1  | NRPS-like       | 21,37   | 44,106  |                                                  |                             |            |
| KB916317.1 | Region 570.1  | NRPS-like       | 135,414 | 177,953 |                                                  |                             |            |
| KB916317.1 | Region 570.2  | NRPS-like       | 200,878 | 238,304 |                                                  |                             |            |
| KB916340.1 | Region 590.1  | NRPS-like       | 49,756  | 93,519  |                                                  |                             |            |
| KB916548.1 | Region 764.1  | NRPS-like       | 76,825  | 120,776 |                                                  |                             |            |
| KB916667.1 | Region 864.1  | NRPS-like       | 1,293   | 44,944  |                                                  |                             |            |
| KB915946.1 | Region 270.1  | NRPS-like,T1PKS | 6,252   | 69,735  |                                                  |                             |            |
| KB915668.1 | Region 24.1   | T1PKS           | 12,15   | 68,081  | azanigerone A                                    | Polyketide                  | 33%        |
| KB915702.1 | Region 54.1   | T1PKS           | 1       | 34,025  |                                                  |                             |            |
| KB915787.1 | Region 127.1  | T1PKS           | 10,302  | 44,913  |                                                  |                             |            |
| KB915792.1 | Region 131.1  | T1PKS           | 9,413   | 57,45   |                                                  |                             |            |
| KB915896.1 | Region 226.1  | T1PKS           | 1       | 43,074  |                                                  |                             |            |
| KB915905.1 | Region 235.1  | T1PKS           | 1       | 15,47   | 4-epi-15-epi-brefeldin A                         | Polyketide:iterative type I | 20%        |
| KB915930.1 | Region 259.2  | T1PKS           | 229,692 | 276,533 |                                                  |                             |            |
| KB916132.1 | Region 428.1  | T1PKS           | 10,011  | 55,459  | terremutin/terreic acid                          | Polyketide                  | 44%        |
| KB916202.1 | Region 483.1  | T1PKS           | 225,506 | 273,291 |                                                  |                             |            |
| KB916240.1 | Region 512.1  | T1PKS           | 58,487  | 105,101 | melanin                                          | Polyketide                  | 100%       |
| KB916367.1 | Region 616.1  | T1PKS           | 1       | 32,761  | (-)-mellein                                      | Polyketide                  | 100%       |
| KB916530.1 | Region 750.1  | T1PKS           | 1       | 27,781  | alternapyrone                                    | Polyketide                  | 60%        |
| KB916578.1 | Region 792.1  | T1PKS           | 13,962  | 45,733  |                                                  |                             |            |
| KB916620.1 | Region 826.1  | T1PKS           | 1       | 39,978  |                                                  |                             |            |
| KB916717.1 | Region 905.1  | T1PKS           | 1       | 36,465  |                                                  |                             |            |
| KB916726.1 | Region 912.1  | T1PKS           | 1       | 24,503  | patulin                                          | Polyketide:iterative type I | 33%        |
| KB916773.1 | Region 957.1  | T1PKS           | 61,679  | 108,565 |                                                  |                             |            |
| KB916895.1 | Region 1049.1 | T1PKS           | 1       | 15,355  |                                                  |                             |            |
| KB916776.1 | Region 959.1  | T1PKS,NRPS      | 357     | 39,898  |                                                  |                             |            |
| KB916727.1 | Region 913.1  | T1PKS,NRPS-like | 1       | 29,301  |                                                  |                             |            |
| KB915641.1 | Region 3.1    | terpene         | 1       | 12,059  | heptelidic acid                                  | Terpene                     | 27%        |
| KB915845.1 | Region 179.1  | terpene         | 43,203  | 68,594  |                                                  |                             |            |
| KB915870.1 | Region 202.1  | terpene         | 32,886  | 57,525  |                                                  |                             |            |
| KB915879.1 | Region 210.1  | terpene         | 77,919  | 103,069 |                                                  |                             |            |
| KB915930.1 | Region 259.1  | terpene         | 155,925 | 177,677 |                                                  |                             |            |
| KB915943.1 | Region 267.1  | terpene         | 6,631   | 27,737  |                                                  |                             |            |
| KB916055.1 | Region 361.1  | terpene         | 16,695  | 39,939  | dimethylcoprogen                                 | Terpene                     | 100%       |
| KB916504.1 | Region 729.1  | terpene         | 129,991 | 153,157 |                                                  |                             |            |
| KB916581.1 | Region 794.1  | terpene         | 16,376  | 37,893  |                                                  |                             |            |
| KB916741.1 | Region 926.1  | terpene         | 15,235  | 46,972  |                                                  |                             |            |
| KB916766.1 | Region 950.1  | terpene         | 182,981 | 204,139 |                                                  |                             |            |
| KB916334.1 | Region 585.1  | terpene,T1PKS   | 29,649  | 79,29   |                                                  |                             |            |

**Table S2. Polymorphisms identified in genes involved in terremutin and mellein biosynthesis between *N. parvum* isolates.** Contig KB916132.1 and KB916367.1, encoding respectively (A) proteins with similarities to enzymes involved in the biosynthesis of terremutin/terreic acid in *A. terreus* and (B) another PKS with 95% similarities with the mellein synthase from *P. nodorum* from reference genome UCR-NP2 that was used to map reads from genome of the isolates Np-B, Np-Bt67, Np-UCR-NP2 and Np-UCD-646-So. Polymorphisms leading to amino-acid changes between proteins of isolates Np-B and Np-Bt67 are indicated by colored boxes (yellow).

| Scaffold                         | Gene                                          | Nucleotide variant position in scaffold | AA variant Position in peptide | Np-B                              | Np-Bt67                           | Np-UCR-NP2                        | Np-UCD-646-So |
|----------------------------------|-----------------------------------------------|-----------------------------------------|--------------------------------|-----------------------------------|-----------------------------------|-----------------------------------|---------------|
| KB916132.1<br>terremutin cluster | Np-atF (UCR-NP2_4355)<br>transcription factor | 28191                                   | 17                             | S                                 | S                                 | N                                 | S             |
|                                  |                                               | 27821                                   | 122                            | K                                 | K                                 | R                                 | K             |
|                                  |                                               | 27579                                   | 203                            | P                                 | P                                 | A                                 | P             |
|                                  |                                               | 27479                                   | 236                            | N                                 | N                                 | T                                 | N             |
|                                  |                                               | 26303                                   | 628                            | I                                 | I                                 | T                                 | I             |
|                                  |                                               | 26020                                   | 723                            | G                                 | -                                 | -                                 | G             |
|                                  |                                               | 25960                                   | 743                            | E                                 | D                                 | D                                 | E             |
|                                  | Np-atX (UCR-NP2_4356)<br>PKS 6-MSA synthase   | 33987                                   | 472                            | D                                 | G                                 | G                                 | D             |
|                                  |                                               | 32532                                   | 957                            | S                                 | N                                 | N                                 | S             |
|                                  |                                               | 31693                                   | 1237                           | A                                 | T                                 | T                                 | A             |
|                                  |                                               | 31660                                   | 1248                           | A                                 | T                                 | T                                 | A             |
|                                  |                                               | 31624                                   | 1260                           | N                                 | N                                 | N                                 | T             |
|                                  |                                               | 31081                                   | 1441                           | VASFLVEKGARRLVLLSR<br>RGLPPRREW K | VASFLVEKGARRLVLLSR<br>RGLPPRREW K | VASFLVEKGARRLVLLSR<br>RGLPPRREW K | -             |
|                                  |                                               | 30781                                   | 1541                           | A                                 | A                                 | P                                 | A             |
|                                  |                                               | 30301                                   | 1701                           | T                                 | T                                 | A                                 | T             |
|                                  | Np-atB (UCR-NP2_4357) MFS                     | 38579                                   | 11                             | E                                 | D                                 | D                                 | E             |
|                                  | Np-atE (UCR-NP2_4359.1) P450                  | 45122                                   | 9                              | V                                 | V                                 | A                                 | V             |
|                                  |                                               | 45056                                   | 31                             | T                                 | I                                 | T                                 | T             |
|                                  | Np-atD (UCR-NP2_4359.2)<br>epoxidase          | 46760                                   | 55                             | D                                 | E                                 | E                                 | D             |
| KB916367.1<br>Mellein synthase   | UCR-NP2_6207,<br>PKS Mellein_Synthase         | 8248                                    | 420                            | K                                 | Q                                 | Q                                 | K             |
|                                  |                                               | 8368                                    | 460                            | R                                 | G                                 | G                                 | R             |
|                                  |                                               | 8380                                    | 464                            | A                                 | P                                 | P                                 | A             |
|                                  |                                               | 8384                                    | 465                            | A                                 | E                                 | E                                 | A             |
|                                  |                                               | 9578                                    | 863                            | T                                 | K                                 | K                                 | T             |
|                                  |                                               | 10168                                   | 1060                           | V                                 | L                                 | V                                 | V             |
|                                  |                                               | 10520                                   | 1177                           | N                                 | S                                 | N                                 | N             |
|                                  |                                               | 10533                                   | 1181                           | E                                 | D                                 | D                                 | E             |
|                                  |                                               | 10702                                   | 1238                           | V                                 | L                                 | L                                 | V             |
|                                  |                                               | 10960                                   | 1324                           | I                                 | V                                 | V                                 | I             |
|                                  |                                               | 11079                                   | 1363                           | Q                                 | H                                 | H                                 | Q             |

**Table S3:** Primer sequences used for qRT-PCR analysis of grapevine defense-related genes.

| Gene         | Name                              | Accession number <sup>1</sup> | Forward Primer (5'-3')     | Reverse primer (5'-3')   | Annealing temperature (°C) | Amplicon size (bp) | Efficiency of primers pairs (%) |
|--------------|-----------------------------------|-------------------------------|----------------------------|--------------------------|----------------------------|--------------------|---------------------------------|
| <i>60RSP</i> | 60S ribosomal protein L18         | XM_002270599 <sup>1</sup>     | ATCTACCTCAAGCTCCTAGTC      | CAATCTTGTCTCTCTTCCT      | 60                         | 166                | 100.0                           |
| <i>EF1</i>   | elongation factor 1-alpha         | XM_002284888 <sup>1</sup>     | AACCAAAATATCCGGAGTAAAAGA   | GAAGTGGGTGCTTGATAGGC     | 60                         | 164                | 100.0                           |
| <i>PR3</i>   | class IV chitinase (CHI4C)        | NM_001281244 <sup>1</sup>     | TCGAATGCGATGGTGAAAA        | TCCCCTGTCGAAACACCAAG     | 60                         | 91                 | 99.9                            |
| <i>PR4</i>   | PR-4 type protein                 | AF061329 <sup>1</sup>         | TGGTTATAGCCAGCCCCATTAG     | AAGCTGCCTGTGGCAAGTG      | 60                         | 151                | 99.2                            |
| <i>LOX9</i>  | Lipoxygenase                      | NM_001281249 <sup>1</sup>     | CCCTTCTTGGCATCTCCCTTA      | TGTTGTGTCCAGGGTCCATTC    | 60                         | 101                | 90.0                            |
| <i>PR1</i>   | pathogenesis-related protein 1    | XM_002273752 <sup>1</sup>     | GGAGTCCATTAGCACTCCTTTG     | CATAATTCTGGGCGTAGGCAG    | 60                         | 168                | 90.0                            |
| <i>PR2</i>   | Class I beta-1,3-glucanase        | NM_001280967 <sup>1</sup>     | TCAATGGCTGCAATGGTGC        | CGGTCGATGTTGCGAGATTTA    | 60                         | 155                | 97.2                            |
| <i>PR5</i>   | thaumatin-like protein            | XM_002282994 <sup>1</sup>     | TTTGATCATCCTTAGGGTAGCTGTAA | ACCAATGAGTACTGTTGCAATTCC | 60                         | 106                | 97.6                            |
| <i>GST1</i>  | glutathione S-transferase         | NM_001281248 <sup>1</sup>     | TGCATGGAGGAGGAGTTCGT       | CAAGGCTATATCCCCATTTCTTC  | 60                         | 98                 | 90.0                            |
| <i>PR10</i>  | pathogenesis-related protein 10.3 | DQ396809 <sup>1</sup>         | CGTTAAGGGCGGCAAAGAG        | GCATCAGGGTGTGCCAAGA      | 60                         | 75                 | 93.5                            |
| <i>PAL</i>   | phenylalanine ammonia lyase       | XM_003635637 <sup>1</sup>     | TCCTCCCGGAAAACAGCTG        | TCCTCCAAATGCCTCAAATCA    | 60                         | 101                | 92.9                            |
| <i>STS</i>   | stilbene synthase                 | NM_001281117 <sup>1</sup>     | AGGAAGCAGCATTGAAGGCTC      | TGCACCAGGCATTCTACACC     | 60                         | 101                | 94.3                            |
| <i>CHI</i>   | Chalcone isomerase                | NM_001281104 <sup>1</sup>     | GCAGAAGCCAAAGCCATTGA       | GCCGATGATGGACTCCAGTAC    | 60                         | 201                | 101.5                           |

<sup>1</sup> NCBI accession number

**Table S4: Amino acids sequences of proteins from genes subjected to re-annotation in this study (Np-atA, Np-atE, Np-atD, UCR-NP2\_6692\_v2, UCR-NP2\_9007\_v2) for strains Np-B and Np-Bt67.**

Np-atB gene, Np-B strain  
Genbank accession ID : OM373092

**>Np-atB\_Np-B**

MSIKSGSSTGEASNSKTSTPNHATPIRGSADEKQQDPEANGEPQWDPAFEVSFSGDTPRNPKSMSSELRK  
WFIVIVATTSLCVACTSSLYTGTYAQVEAEFGSRRVITTLGLSMFVVGLGLSPMVLAPLCEFYGRKPVIYASTF  
FFVWVWIIPCAVAKNITTLVIARFLDGFAGAAFLSVAGGTVGDLFTKSTLQAPMMVYTASPFLGPVIGNFN  
YYVNWRTFWVLLIWAGVQFLLVLCVPETYSPLLRKEAQKMRKETGDDRWHAIEKMKRSVGGTILRSC  
YRPFMLLLLLEPMVLLLCCTFCVAVLGVLYLFFGAFNLVFTNNHNFNHWQVGLSFLGIMVGMVIGILSDPLWKKN  
YLRLLENHKKRTGEAGSEPEYRLAPSIVGAPLVVIGLFWFGWTQYSFIHWMVPIVGSAFFGCGIILVFSGIFTFL  
VESYPLYAASALAANSFARSMFAAMFPLFGPAMYNNLGYQWATFLLTMICCVLAPFPYIFYKYGKRIRKRSRY  
VGAR

-----  
Np-atB gene, Np-Bt67 strain  
Genbank accession ID : OM373093

**>Np-atB\_Np-Bt67**

MSIKSGSSTGDASNSKTSTPNHATPIRGSADEKQQDPEANGEPQWDPAFEVSFSGDTPRNPKSMSSELRK  
WFIVIVATTSLCVACTSSLYTGTYAQVEAEFGSRRVITTLGLSMFVVGLGLSPMVLAPLCEFYGRKPVIYASTF  
FFVWVWIIPCAVAKNITTLVIARFLDGFAGAAFLSVAGGTVGDLFTKSTLQAPMMVYTASPFLGPVIGNFN  
YYVNWRTFWVLLIWAGVQFLLVLCVPETYSPLLRKEAQKMRKETGDDRWHAIEKMKRSVGGTILRSC  
YRPFMLLLLLEPMVLLLCCTFCVAVLGVLYLFFGAFNLVFTNNHNFNHWQVGLSFLGIMVGMVIGILSDPLWKKN  
YLRLLENHKKRTGEAGSEPEYRLAPSIVGAPLVVIGLFWFGWTQYSFIHWMVPIVGSAFFGCGIILVFSGIFTFL  
VESYPLYAASALAANSFARSMFAAMFPLFGPAMYNNLGYQWATFLLTMICCVLAPFPYIFYKYGKRIRKRSRY  
VGAR

-----  
Np-atE gene, Np-B strain  
Genbank accession ID : OM373094

**>Np-atE\_Np-B**

MESPSSLVPPISLHREHFFAVSLFLVLATIVSALRIGKREKNLPPGPPTIPLLNEHLIPKADGHFIMGKWAK  
EYGGIFSLKRFMNTTLVINDWKYVKSLLDKKSTLYSYRPKSLVADLITRGDHILMMQYGDWTRTVRKLHQTF  
MESNCDKYHYKVQEAEANQMIYDFMVNPNADHMSHPKRFNSITMSLVFGFRTKSVNDDYLRLLYHAMEKW  
SLVLETGATPPVDSFPLLKLIPERFMGNWRSRAIECGDLMRDLYGEVLEKVRQRRQQGINKGSLMDKVLDDQQ  
SKYNFNDHQLAFFGGTLMEGGSDTSSSLVLAIIQAMTQYPEVQKRAQAEIDSVVGFDRSPRWSDFSKLPYIN  
MIIKEAHRWRPVLPLGVVHAVAQDDTVDGMHLPKESTVIINVWALHNDEKRWKSPEDFIPERYETYPELAPFY  
AASKDFDKRDHLGYGASRRICPGIHLAERNLFIAAAKLLWAFDFAVDPMNMKNDASAETGSSQGFMHCVKDYE  
CKITLRDERKRETILRELADAQPIFAQYE

-----  
Np-atE gene, Np-Bt67 strain  
Genbank accession ID : OM373095

**>Np-atE\_Np-Bt67**

MESPSSLVPPISLHREHFFAVSLFLVLAIIVSALRIGKREKNLPPGPPTIPLLNEHLIPKADGHFIMGKWAKE  
YGGIFSLKRFMNTTLVINDWKYVKSLLDKKSTLYSYRPKSLVADLITRGDHILMMQYGDWTRTVRKLHQTFM  
ESNCDKYHYKVQEAEANQMIYDFMVNPNADHMSHPKRFNSITMSLVFGFRTKSVNDDYLRLLYHAMEKWSL  
VLETGATPPVDSFPLLKLIPERFMGNWRSRAIECGDLMRDLYGEVLEKVRQRRQQGINKGSLMDKVLDDQQS  
KYNFNDHQLAFFGGTLMEGGSDTSSSLVLAIIQAMTQYPEVQKRAQAEIDSVVGFDRSPRWSDFSKLPYINM  
IIEAHRWRPVLPLGVVHAVAQDDTVDGMHLPKESTVIINVWALHNDEKRWKSPEDFIPERYETYPELAPFYA  
ASKDFDKRDHLGYGASRRICPGIHLAERNLFIAAAKLLWAFDFAVDPMNMKNDASAETGSSQGFMHCVKDYE  
KITLRDERKRETILRELADAQPIFAQYE



Np-atD gene, Np-B strain  
Genbank accession ID : OM373096

**>Np-atD\_Np-B**

MPLFTPFVYPYHVSAGQNEIKKFGGLLTTEWLPLPLGRSFRLRQTYRKTIDGPIPDNLRKLINSPGRPKGPPTH  
FHQWQTEYFTVEHGVCAVEIDGKVTKLTPADGEVSVKPGHIHAFWLDDETPDYMTVILSATDSGKDYQLDRV  
FFENWYGYWHDALLYEGGLDLIQLTCTHDAGDHYTPAPKWVPFRRFFGYWGCVIIGRWLGGMLGYKPFKE  
YTTDWDYAVEKMNGSFWQRRADKSYTHRTTWDRQVELSQGPDPRNAEYQDMVTDLAETRDPSKTIETAG  
LPIPVAGPEGPFWGKVALNGTRVDSVSGISSGFEVNGTGKAAALSQRREHS

Np-atD gene, Np-Bt67 strain  
Genbank accession ID : OM373097

**>Np-atD\_Np-Bt67**

MPLFTPFVYPYHVSAGQNEIKKFGGLLTTEWLPLPLGRSFRLRQTYRKTIDGPIPENLRKLINSPGRPKGPPTH  
FHQWQTEYFTVEHGVCAVEIDGKVTKLTPADGEVSVKPGHIHAFWLDDETPDYMTVILSATDSGKDYQLDRV  
FFENWYGYWHDALLYEGGLDLIQLTCTHDAGDHYTPAPKWVPFRRFFGYWGCVIIGRWLGGMLGYKPFKE  
YTTDWDYAVEKMNGSFWQRRADKSYTHRTTWDRQVELSQGPDPRNAEYQDMVTDLAETRDPSKTIETAG  
LPIPVAGPEGPFWGKVALNGTRVDSVSGISSGFEVNGTGKAAALSQRREHS

UCR-NP2\_6692\_v2, Np-B strain  
Genbank accession ID : OM677640

**>UCR-NP2\_6692\_v2\_Np-B**

MPAKRPPPSGATPGSTTKHPKTEHQSSDDFSSSVKKKLSASTRTGQACDRCKVRKIRCDGRPGGCSPCVQ  
NNTCKTTDRITGRATTRGHTEQLEYENNHLKGALYALQQQLKEIGVEPRIPSNPQAPQGFAPSLSPQPQSA  
WQNGSHDGQLWGSTPPAPSTASLSNYPHMDANGTRDTDQSQFHGPNLPTFRAGLHGDNYLGVSSANSV  
LSPIKGTSLSFFGMEIDLNDVPDDVEDSSNPVSYQHFLSVALNAPGCPRPKKEELPASYSSECATYATWYFRG  
LHPYAPVLKYPHFMELLSRIYSDPTYQPTPAEEVQVQMVLAFIKYQFSARNGNAESLKQAHAHYRYALSFFYT  
LVNSHTIADVQALTMICLHLRNFPKPGAAWMMSSMTFMISVELGLHRSARAWTDMGPKRDPPIEVETRKRKF  
WTLHGLYIALCGRLGRLPMLRMEDIDVEFPEPIHDYLPSETNLSDFRKCSFHVGLQAIRILAVHSEMYSTIHAV  
RQSPDLYATHLRRLEDEHRKWKEQVPLELREGSRADSEDIYFSLYVQFWDHEFNLMMLHHPAMCRSRDPELL  
NSNMSICIAATSKMVRVLDEVRYKYSLDAPWVNCTAYLAAMLTLFVYSHRKDELTSDDLAKLKSEMDMWLLI  
MDECGSILGSGKRLEKACRSIIDHTVQNISHHLAKKTASAASAVANVLKTEPDTSRQEPPTAPSYANNAYAS  
AYGHTVNGHANVHKPSTGGYLPDDPSLSQSSNPYPYTVQAQYSSYPEQ AQTRLPYQNGAPRYEQTYQYVNP  
GGDMNAAHVAAAAAAATQDSSAAFAYPPGSHGNFGQVTNQSDAWRQWMMTNLGPQEYHHASALMALG  
HTGGHDTAVSTGADDNPGVLADMHSVAVNGLHSPHPAVSAAVAQAHAHSQQLWPLMVFDIGQQGGPNVTQ

UCR-NP2\_6692\_v2, Np-Bt67 strain  
Genbank accession ID : OM677641

**>UCR-NP2\_6692\_v2\_Np-Bt67**

MPAKRPPPSGATPGSTTKHPKTEHQSSDDFSSSVKKKLSASTRTGQACDRCKVRKIRCDGRPGGCSPCVQ  
NNTCKTTDRITGRATTRGHTEQLEYENNHLKGALYALQQQLKEIGVEPRIPSNPQAPQGFAPSLSPQPQSA  
WQNGSHDGQLWGSTPPAPSTASLSNYPHMDANGTRDTDQSQFHGPNLPTFRAGLHGDNYLGVSSANSV  
LSPIKGTSLSFFGMEIDLNDVPDDVEDSSNPVSYQHFLSVALNAPGCPRPKKEELPASYSSECATYATWYFRG  
LHPYAPVLKYPHFMELLSRIYSDPTYQPTPAEEVQVQMVLAFIKYQFSARNGNAESLKQAHAHYRYALSFFYT  
LVNSHTIADVQALTMICLHLRNFPKPGAAWMMSSMTFMISVELGLHRSARAWTDMGPKRDPPIEVETRKRKF  
WTLHGLYIALCGRLGRLPMLRMEDIDVEFPEPIHDYLPSETNLSDFRKCSFHVGLQAIRILAVHSEMYSTIHAV  
RQSPDLYATHLRRLEDEHRKWKEQVPLELREGSRADSEDIYFSLYVQFWDHEFNLMMLHHPAMCRSRDPELL  
NSNMSICIAATSKMVRVLDEVRYKYSLDAPWVNCTAYLAAMLTLFVYSHRKDELTSDDLAKLKSEMDMWLLI  
MDECGSILGSGKRLEKACRSIIDHTVQNISHHLAKKTASAASAVANVLKTEPDTSRQEPPTAPSYANNAYAS  
AYGHTVNGHANVHKPSTGGYLPDDPSLSQSSNPYPYTVQAQYSSYPEQ AQTRLPYQNGAPRYEQTYQYVNP  
GGDMNAAHVAAAAAAATQDSSAAFAYPPGSHGNFGQVTNQSDAWRQWMMTNLGPQEYHHASALMALG  
HTGGHDTAVSTGADDNPGVLADMHSVAVNGLHSPHPAVSAAVAQAHAHSQQLWPLMVFDIGQQGGPNVTQ

UCR-NP2\_9007\_v2, Np-B strain  
Genbank accession ID : OM677642

**>UCR-NP2\_9007\_v2\_Np-B**

MHQTSSRLLRMTDDDRPFTRDFKDLFSTLMVSLPLTPHRVRWQKVDHSFTSEEAMTNLGSLKFSQSNRMP  
DPKDPSRIVTTTTTTTTFSMAKEMARSVQCQKFLEARFIESVEGKTD FMSKTAVWQMTPKGMHVLQRFCQRNGI  
NQKHVYEVLDSSRNTMHLVILERELETDKLNHDQATIEVVFRFVGHGEPNAKANTAQADSDSLNEYSTGMV  
GVKMARERKIGDKIYMNTFTGKASVDWLMDCSTMVDKREAYEMCSLFYEFGLMAPVEVFPNSNRFQPTKS  
AIYYVTEKGQRIAGWIQSPKASLNGDAAAAAANRPREGTTRDSNANRMTVIIIRDPALRLLFREFLRETHCEEN  
LSFYLDVSEFLGGYKQAKRANQTPKLEIIRETLAAAYSLYNAFLAPGSPCELNIDHSLRTALAARMTRAVGDDE  
AMVRSLEVATLFDQAQNSVFKLMASDSVPKFMREPKYASVIRDRNLDAMPGSFNNNNNSAGLAAS

---

UCR-NP2\_9007\_v2, Np-Bt67 strain  
Genbank accession ID : OM677643

**>UCR-NP2\_9007\_v2\_Np-Bt67**

MHQTSSRLLRMTDDDRPFTRDFKDLFSTLMVSLPLTPHRVRWQKVDHSFTSEEAMTNLGSLKFSQSNRMP  
DPKDPSRIVTTTTTTTTFSMAKEMARSVQCQKFLEARFIESVEGKTD FMSKTAVWQMTPKGMHVLQRFCQRNGI  
NQKHVYEVLDSSRNTMHLVILERELETDKLNHDQATIEVVFRFVGHGEPNAKANTAQADSDSLNEYSTGMV  
GVKMARERKIGDKIYMNTFTGKASVDWLMDCSTMVDKREAYEMCSLFYEFGLMAPVEVFPNSNRFQPTKS  
AIYYVTEKGQRIAGWIQSPKASLNGDAAAAAANRPREGTTRDSNANRMTVIIIRDPALRLLFREFLRETHCEEN  
LSFYLDVSEFLGGYKQAKRANQTPKLEIIRETLAAAYSLYNAFLAPGSPCELNIDHSLRTALAARMTRAVGDDE  
AMVRSLEVATLFDQAQNSVFKLMASDSVPKFMREPKYASVIRDRNLDAMPGSFNNNNNSAGLAAS
